# Supplementary material for: Nanopore Is Preferable over Illumina for 16S Amplicon Sequencing of the Gut Microbiota When Species-Level Taxonomic Classification, Accurate Estimation of Richness, or Focus on Rare Taxa Is Required
Source: MDPI journal article supplement (doi:10.3390/microorganisms11030804), 2023-03-21
Supplement: s1 [file s1]

Nanopore is preferable over Illumina for 16S amplicon sequencing of the gut microbiota when species-level taxonomic classification, accurate estimation of richness, or focus on rare taxa is required

Márton Szoboszlay<sup>1</sup>, Laetitia Schramm<sup>1</sup>, David Pinzauti<sup>1</sup>, Jeanesse Scerri<sup>1</sup>, Anna Sandionigi<sup>2</sup>, Manuele Biazzo<sup>1</sup>

<sup>1</sup>The BioArte Ltd, San Gwann, Malta

<sup>2</sup>University of Milan Bicocca, DISCO, Milan, Italy

## Supplementary tables

**Table S1: Sequencing yield.**

| Sample | Illumina raw read pairs | Nanopore raw reads | Nanopore trimmed reads | Nanopore quality filtered reads |
|--------|-------------------------|--------------------|------------------------|---------------------------------|
| Mock   | 104889                  | 178513             | 161733                 | 100506                          |
| Mock   | 126117                  | 181006             | 164518                 | 101523                          |
| Mock   | 136677                  | 162365             | 147664                 | 91350                           |
| A1     | 126280                  | 199489             | 180961                 | 111640                          |
| A1     | 138564                  | 198499             | 179941                 | 111761                          |
| A1     | 108634                  | 187606             | 169693                 | 105160                          |
| B1     | 110781                  | 161598             | 146228                 | 90066                           |
| B1     | 130274                  | 177145             | 159998                 | 99062                           |
| B1     | 118184                  | 165345             | 149378                 | 92191                           |
| AN1    | 120367                  | 190866             | 173056                 | 106591                          |
| AN1    | 125680                  | 181985             | 164611                 | 100666                          |
| AN1    | 112429                  | 182352             | 164744                 | 101844                          |
| MD01   | 119083                  | 250784             | 227059                 | 139562                          |
| MD01   | 109324                  | 230994             | 209913                 | 127798                          |
| MD01   | 106072                  | 224344             | 204196                 | 125022                          |
| S1X    | 113130                  | 217891             | 197947                 | 121585                          |
| S1X    | 136979                  | 236344             | 214118                 | 131186                          |
| S1X    | 130658                  | 240542             | 218454                 | 133814                          |
| S2P    | 108602                  | 245526             | 223887                 | 127347                          |
| S2P    | 121263                  | 236612             | 214531                 | 133116                          |
| S2P    | 105438                  | 239594             | 217607                 | 135519                          |

**Table S2: The number of Nanopore reads at each stage of the EzBioCloud MTP pipeline.**

| Sample | Uploaded | Low quality or not 16S | Not bacterial | Chimeric | Passed | Classified to species, phylotypes, or species groups |
|--------|----------|------------------------|---------------|----------|--------|------------------------------------------------------|
| Mock   | 100000   | 1273                   | 0             | 13431    | 85296  | 84551                                                |

|             |        |      |    |       |       |       |
|-------------|--------|------|----|-------|-------|-------|
| <b>Mock</b> | 100001 | 1293 | 0  | 14903 | 83805 | 83085 |
| <b>Mock</b> | 91350  | 1119 | 0  | 12583 | 77648 | 76985 |
| <b>A1</b>   | 100000 | 1615 | 0  | 23154 | 75231 | 74834 |
| <b>A1</b>   | 100000 | 1493 | 0  | 22369 | 76138 | 75776 |
| <b>A1</b>   | 100000 | 1554 | 0  | 23054 | 75392 | 75027 |
| <b>B1</b>   | 90066  | 1799 | 0  | 22104 | 66163 | 65172 |
| <b>B1</b>   | 99062  | 2023 | 0  | 25646 | 71393 | 70284 |
| <b>B1</b>   | 92191  | 1786 | 0  | 22563 | 67842 | 66779 |
| <b>AN1</b>  | 100000 | 1691 | 0  | 20953 | 77356 | 76633 |
| <b>AN1</b>  | 100000 | 1717 | 0  | 20406 | 77877 | 77160 |
| <b>AN1</b>  | 100000 | 1684 | 10 | 20451 | 77855 | 77082 |
| <b>MD01</b> | 100000 | 1769 | 5  | 15234 | 82992 | 82217 |
| <b>MD01</b> | 100000 | 1952 | 10 | 18327 | 79711 | 79027 |
| <b>MD01</b> | 100000 | 1883 | 2  | 16308 | 81807 | 81082 |
| <b>S1X</b>  | 100000 | 2205 | 0  | 25069 | 72726 | 69749 |
| <b>S1X</b>  | 100000 | 2176 | 6  | 24719 | 73099 | 70287 |
| <b>S1X</b>  | 100000 | 2185 | 0  | 24810 | 73005 | 70036 |
| <b>S2P</b>  | 100000 | 1377 | 0  | 14416 | 84207 | 83562 |
| <b>S2P</b>  | 100000 | 1473 | 0  | 16577 | 81950 | 81130 |
| <b>S2P</b>  | 100000 | 1308 | 0  | 13977 | 84715 | 83943 |

**Table S3: The number of Illumina reads at each stage of the EzBioCloud MTP pipeline.**

| <b>Sample</b> | <b>Uploaded</b> | <b>Low quality or not<br/>16S</b> | <b>Not<br/>bacterial</b> | <b>Chimeric</b> | <b>Passed</b> | <b>Classified to<br/>species,<br/>phylotypes, or<br/>species groups</b> |
|---------------|-----------------|-----------------------------------|--------------------------|-----------------|---------------|-------------------------------------------------------------------------|
| <b>Mock</b>   | 100000          | 825                               | 119                      | 8007            | 91049         | 87586                                                                   |
| <b>Mock</b>   | 100000          | 934                               | 165                      | 6860            | 92041         | 87598                                                                   |
| <b>Mock</b>   | 100000          | 1094                              | 253                      | 6999            | 91654         | 86840                                                                   |
| <b>A1</b>     | 100000          | 527                               | 18                       | 7136            | 92319         | 89941                                                                   |
| <b>A1</b>     | 100000          | 486                               | 21                       | 6550            | 92943         | 90640                                                                   |
| <b>A1</b>     | 100000          | 507                               | 22                       | 6943            | 92528         | 90383                                                                   |
| <b>B1</b>     | 100000          | 526                               | 91                       | 7088            | 92295         | 87673                                                                   |
| <b>B1</b>     | 100000          | 686                               | 17                       | 7636            | 91661         | 86507                                                                   |
| <b>B1</b>     | 100000          | 505                               | 43                       | 7143            | 92309         | 88140                                                                   |
| <b>AN1</b>    | 100000          | 737                               | 55                       | 8143            | 91065         | 86083                                                                   |
| <b>AN1</b>    | 100000          | 506                               | 44                       | 8150            | 91300         | 86315                                                                   |
| <b>AN1</b>    | 100000          | 690                               | 57                       | 8189            | 91064         | 85718                                                                   |
| <b>MD01</b>   | 100000          | 537                               | 2448                     | 8964            | 88051         | 82813                                                                   |
| <b>MD01</b>   | 100000          | 545                               | 2054                     | 8823            | 88578         | 83297                                                                   |
| <b>MD01</b>   | 100000          | 669                               | 1895                     | 9134            | 88302         | 83785                                                                   |
| <b>S1X</b>    | 100000          | 702                               | 180                      | 8651            | 90467         | 85917                                                                   |
| <b>S1X</b>    | 100000          | 659                               | 136                      | 8431            | 90774         | 85948                                                                   |
| <b>S1X</b>    | 100000          | 671                               | 301                      | 8448            | 90580         | 86298                                                                   |
| <b>S2P</b>    | 100000          | 809                               | 108                      | 10299           | 88784         | 79804                                                                   |
| <b>S2P</b>    | 100000          | 855                               | 51                       | 8848            | 90246         | 80417                                                                   |

|            |        |     |    |      |       |       |
|------------|--------|-----|----|------|-------|-------|
| <b>S2P</b> | 100000 | 787 | 93 | 9977 | 89143 | 80501 |
|------------|--------|-----|----|------|-------|-------|

**Table S4: Relative abundance (%) of the bacterial genera in the mock community compared to the Nanopore and Illumina results from the EzBioCloud MTP pipeline.**

| Genus                   | Composition | Nanopore |       |       | Illumina |        |        |
|-------------------------|-------------|----------|-------|-------|----------|--------|--------|
| <i>Akkermansia</i>      | 0.97        | 1.61     | 1.69  | 1.58  | 0.67     | 0.58   | 0.39   |
| <i>Bacteroides</i>      | 9.94        | 14.06    | 14.27 | 13.95 | 11.26    | 8.73   | 14.96  |
| <i>Bifidobacterium</i>  | 8.78        | 6.75     | 7.28  | 6.99  | 8.24     | 9.66   | 8.28   |
| <i>Clostridioides</i>   | 2.62        | 5.43     | 5.06  | 5.43  | 1.69     | 2.70   | 2.15   |
| <i>Clostridium</i>      | 0.0002      | 0        | 0     | 0     | 0.270    | 0.013  | 0.023  |
| <i>Enterococcus</i>     | 0.0009      | 0        | 0     | 0     | 0.0868   | 0.0054 | 0.0011 |
| <i>Escherichia</i>      | 12.12       | 10.82    | 10.97 | 10.63 | 5.41     | 8.42   | 7.53   |
| <i>Faecalibacterium</i> | 17.63       | 15.00    | 14.58 | 14.64 | 13.70    | 17.37  | 17.37  |
| <i>Fusobacterium</i>    | 7.49        | 7.64     | 7.38  | 7.09  | 9.09     | 13.61  | 4.47   |
| <i>Lactobacillus</i>    | 9.63        | 5.68     | 5.67  | 6.01  | 2.34     | 4.13   | 3.26   |
| <i>Prevotella</i>       | 4.98        | 6.58     | 6.44  | 6.48  | 5.62     | 0.94   | 4.14   |
| <i>Roseburia</i>        | 9.89        | 7.15     | 7.11  | 7.12  | 5.79     | 6.78   | 6.11   |
| <i>Salmonella</i>       | 0.009       | 0.018    | 0.024 | 0.012 | 0        | 0      | 0      |
| <i>Veillonella</i>      | 15.87       | 19.24    | 19.52 | 20.06 | 5.67     | 3.33   | 3.99   |
| <b>Total</b>            | 99.93       | 99.97    | 99.98 | 99.99 | 69.83    | 76.27  | 72.67  |

**Table S5: Relative abundance (%) of the bacterial genera in the mock community compared to the Illumina results from the QIIME2 and mothur pipelines.**

| Genus                   | Composition | Illumina QIIME2 |        |       | Illumina mothur |        |         |
|-------------------------|-------------|-----------------|--------|-------|-----------------|--------|---------|
| <i>Akkermansia</i>      | 0.97        | 0.71            | 0.63   | 0.38  | 0.68            | 0.58   | 0.36    |
| <i>Bacteroides</i>      | 9.94        | 11.30           | 8.93   | 15.36 | 9.51            | 7.85   | 13.95   |
| <i>Bifidobacterium</i>  | 8.78        | 8.22            | 9.66   | 8.31  | 8.23            | 9.57   | 8.13    |
| <i>Clostridioides</i>   | 2.62        | 1.75            | 2.75   | 2.19  | 1.69            | 2.60   | 2.10    |
| <i>Clostridium</i>      | 0.0002      | 0.24            | 0.0060 | 0.015 | 0.23            | 0.012  | 0.019   |
| <i>Enterococcus</i>     | 0.0009      | 0.11            | 0      | 0     | 0.081           | 0.0037 | 0.00086 |
| <i>Escherichia</i>      | 12.12       | 5.56            | 8.62   | 7.74  | 5.66            | 8.43   | 7.58    |
| <i>Faecalibacterium</i> | 17.63       | 13.73           | 17.86  | 17.58 | 14.20           | 17.74  | 17.59   |
| <i>Fusobacterium</i>    | 7.49        | 9.13            | 13.80  | 4.47  | 9.22            | 13.60  | 4.39    |
| <i>Lactobacillus</i>    | 9.63        | 2.43            | 4.25   | 3.43  | 2.28            | 3.10   | 2.25    |
| <i>Prevotella</i>       | 4.98        | 5.67            | 0.95   | 4.27  | 5.66            | 0.91   | 4.13    |
| <i>Roseburia</i>        | 9.89        | 4.44            | 5.68   | 5.01  | 4.38            | 5.58   | 4.91    |
| <i>Salmonella</i>       | 0.009       | 0               | 0      | 0     | 0               | 0      | 0       |
| <i>Veillonella</i>      | 15.87       | 5.64            | 3.34   | 4.16  | 5.68            | 3.28   | 4.03    |
| <b>Total</b>            | 99.93       | 69.0            | 76.5   | 72.9  | 67.6            | 73.3   | 69.5    |

**Table S6: The percentage of reads classified into species and genera in the faecal samples.**

|        | Reads classified as species or phylotypes (%) |          | Reads classified as genera or phylotype genera (%) |          |
|--------|-----------------------------------------------|----------|----------------------------------------------------|----------|
| Sample | Nanopore                                      | Illumina | Nanopore                                           | Illumina |

|             |      |      |        |       |
|-------------|------|------|--------|-------|
| <b>A1</b>   | 86.2 | 53.0 | 99.98  | 99.40 |
| <b>A1</b>   | 86.2 | 52.8 | 99.99  | 99.44 |
| <b>A1</b>   | 85.6 | 51.5 | 99.98  | 99.51 |
| <b>AN1</b>  | 92.4 | 28.4 | 99.97  | 99.10 |
| <b>AN1</b>  | 92.4 | 30.8 | 99.93  | 99.16 |
| <b>AN1</b>  | 92.0 | 31.1 | 99.98  | 99.27 |
| <b>B1</b>   | 94.8 | 40.2 | 99.96  | 99.35 |
| <b>B1</b>   | 94.5 | 39.7 | 99.97  | 99.02 |
| <b>B1</b>   | 94.7 | 38.7 | 99.95  | 99.33 |
| <b>MD01</b> | 83.2 | 53.8 | 99.77  | 98.46 |
| <b>MD01</b> | 82.2 | 53.0 | 99.89  | 99.18 |
| <b>MD01</b> | 82.1 | 53.5 | 99.83  | 99.06 |
| <b>S1X</b>  | 91.8 | 53.8 | 99.79  | 99.27 |
| <b>S1X</b>  | 92.0 | 53.1 | 99.90  | 99.25 |
| <b>S1X</b>  | 91.9 | 53.6 | 99.75  | 99.34 |
| <b>S2P</b>  | 97.4 | 52.3 | 100.00 | 99.24 |
| <b>S2P</b>  | 96.8 | 52.5 | 99.98  | 98.95 |
| <b>S2P</b>  | 97.3 | 51.1 | 100.00 | 99.12 |

**Table S7: The number of species-level taxa detected in the faecal samples.**

| <b>Sample</b> | <b>Species</b> |          | <b>Species groups</b> |          | <b>Phylotypes</b> |          | <b>Phylotype groups</b> |          |
|---------------|----------------|----------|-----------------------|----------|-------------------|----------|-------------------------|----------|
|               | Nanopore       | Illumina | Nanopore              | Illumina | Nanopore          | Illumina | Nanopore                | Illumina |
| <b>A1</b>     | 82             | 214      | 18                    | 309      | 46                | 933      | 1                       | 115      |
| <b>A1</b>     | 82             | 198      | 15                    | 286      | 51                | 791      | 1                       | 101      |
| <b>A1</b>     | 88             | 193      | 18                    | 315      | 49                | 916      | 1                       | 107      |
| <b>AN1</b>    | 127            | 241      | 32                    | 352      | 130               | 967      | 1                       | 105      |
| <b>AN1</b>    | 117            | 187      | 31                    | 298      | 123               | 816      | 1                       | 92       |
| <b>AN1</b>    | 122            | 229      | 30                    | 316      | 122               | 965      | 1                       | 116      |
| <b>B1</b>     | 99             | 213      | 15                    | 297      | 164               | 900      | 1                       | 102      |
| <b>B1</b>     | 96             | 245      | 14                    | 343      | 158               | 1065     | 2                       | 117      |
| <b>B1</b>     | 93             | 236      | 11                    | 355      | 158               | 864      | 1                       | 92       |
| <b>MD01</b>   | 95             | 197      | 25                    | 258      | 179               | 801      | 1                       | 88       |
| <b>MD01</b>   | 101            | 195      | 25                    | 293      | 189               | 946      | 1                       | 109      |
| <b>MD01</b>   | 102            | 218      | 24                    | 307      | 192               | 1139     | 2                       | 123      |
| <b>S1X</b>    | 99             | 240      | 18                    | 316      | 234               | 1158     | 1                       | 129      |
| <b>S1X</b>    | 104            | 231      | 20                    | 324      | 249               | 1089     | 1                       | 110      |
| <b>S1X</b>    | 99             | 219      | 20                    | 328      | 241               | 1113     | 2                       | 122      |
| <b>S2P</b>    | 92             | 242      | 16                    | 351      | 104               | 1124     | 1                       | 135      |
| <b>S2P</b>    | 87             | 292      | 11                    | 394      | 102               | 1236     | 1                       | 128      |
| <b>S2P</b>    | 84             | 271      | 9                     | 411      | 103               | 1146     | 1                       | 120      |

**Table S8: The number of genera detected in the faecal samples.**

| <b>Sample</b> | <b>Genera</b> |          | <b>Phylotype genera</b> |          |
|---------------|---------------|----------|-------------------------|----------|
|               | Nanopore      | Illumina | Nanopore                | Illumina |

|             |    |     |    |     |
|-------------|----|-----|----|-----|
| <b>A1</b>   | 63 | 392 | 5  | 354 |
| <b>A1</b>   | 64 | 376 | 6  | 318 |
| <b>A1</b>   | 68 | 388 | 6  | 378 |
| <b>AN1</b>  | 94 | 452 | 31 | 418 |
| <b>AN1</b>  | 91 | 360 | 28 | 337 |
| <b>AN1</b>  | 89 | 398 | 29 | 391 |
| <b>B1</b>   | 83 | 395 | 40 | 363 |
| <b>B1</b>   | 76 | 439 | 45 | 442 |
| <b>B1</b>   | 77 | 431 | 42 | 374 |
| <b>MD01</b> | 89 | 353 | 56 | 315 |
| <b>MD01</b> | 92 | 392 | 59 | 349 |
| <b>MD01</b> | 90 | 406 | 65 | 435 |
| <b>S1X</b>  | 91 | 415 | 65 | 428 |
| <b>S1X</b>  | 94 | 411 | 76 | 410 |
| <b>S1X</b>  | 93 | 409 | 72 | 439 |
| <b>S2P</b>  | 77 | 435 | 26 | 424 |
| <b>S2P</b>  | 72 | 477 | 27 | 494 |
| <b>S2P</b>  | 71 | 483 | 26 | 469 |

## Supplementary figures

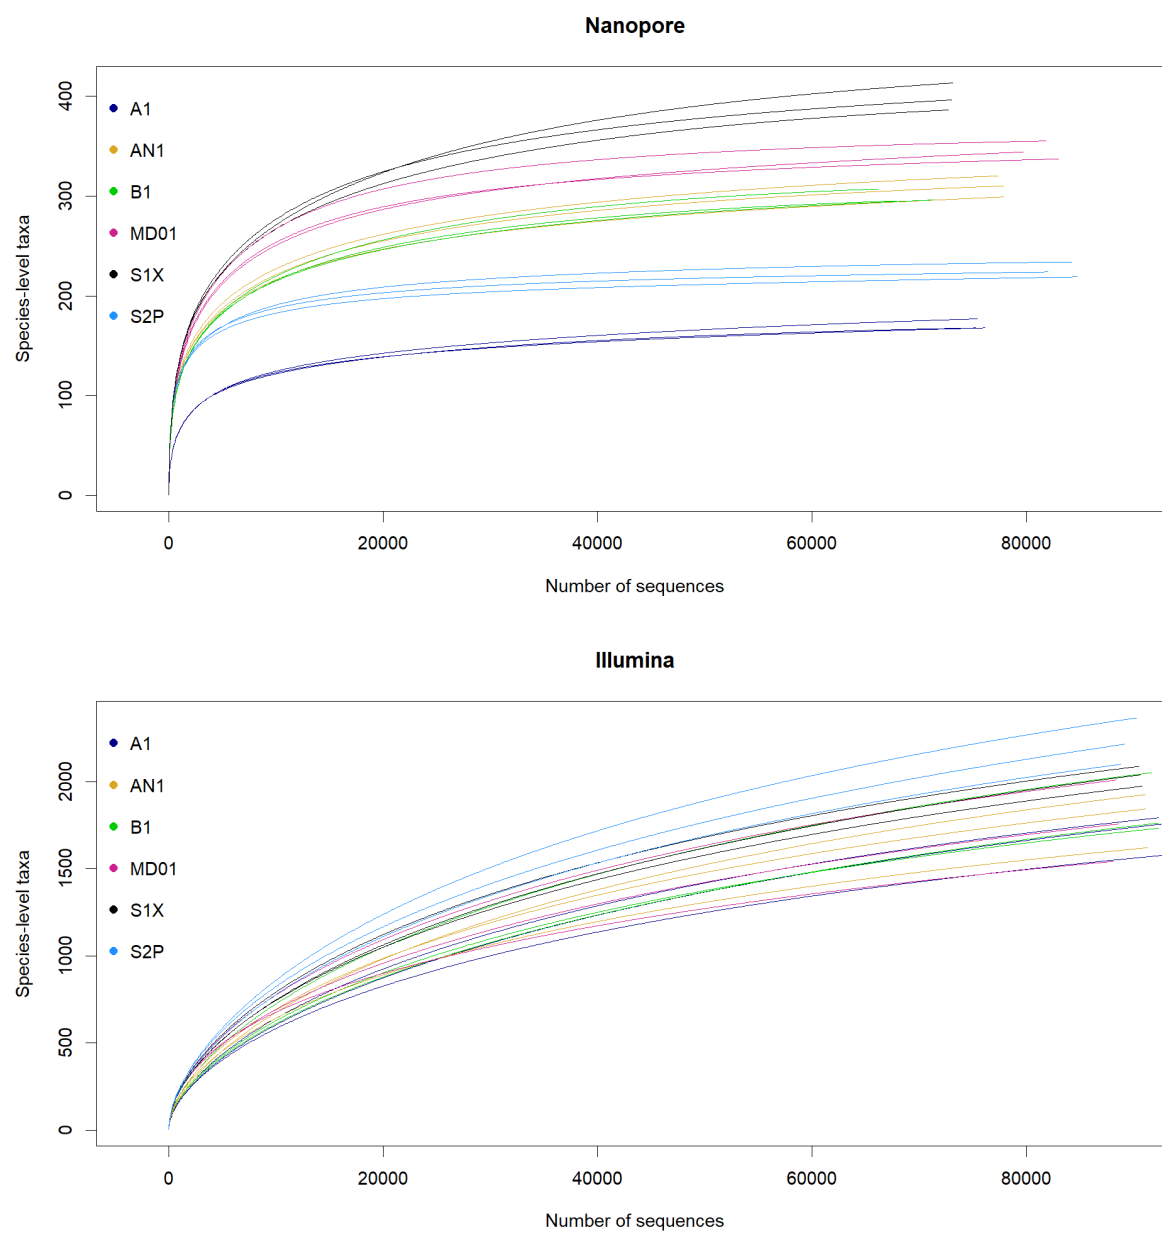

Figure S1: Rarefaction curves.

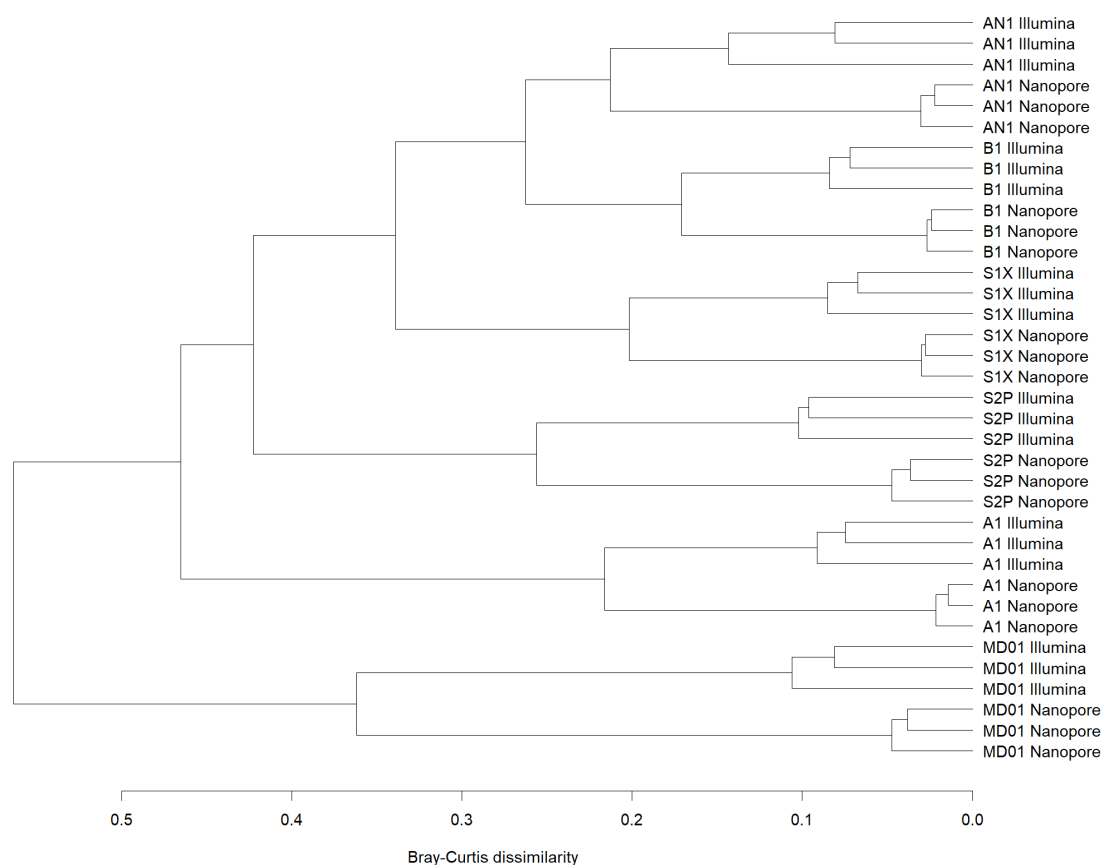

**Figure S2: Clustering of the faecal samples based on their genus-level bacterial community structure**

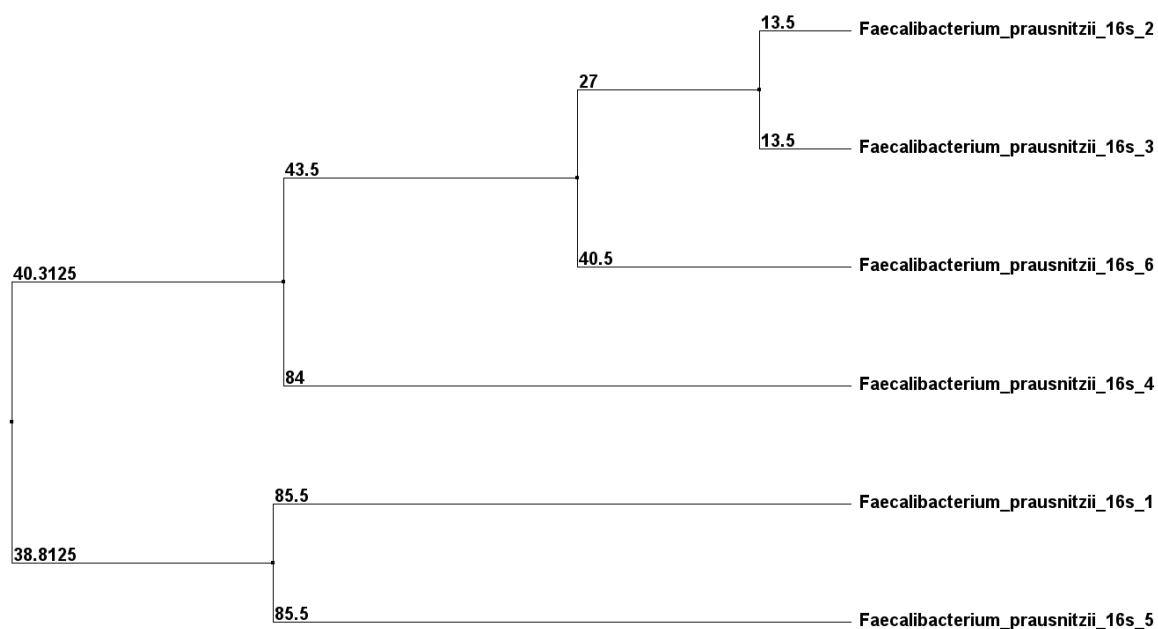

**Figure S3: Average distance clustering of the 16S rRNA gene sequences of the *Faecalibacterium prausnitzii* AP34BHI genome after Clustal WS alignment**
